# Supplementary material
Source: PubMed Central journal article supplement (PMC3370491)
Supplement: supp_78.13.4627_AEM-AEM00806-12-s01.pdf [file supp_78.13.4627_AEM-AEM00806-12-s01.pdf]

**Table S1.** *Wolbachia*, SGHV and *Trypanosoma* prevalence in *Gff* populations (divided by mtDNA haplogroup and sex as well as total) belonging to:

(a) the northern microsatellite group: AR, BK, BN, DK, MY, OS and PT

|           | mtDNA | Sex | Sample Size | % <i>Wolbachia</i> | % SGHV | % <i>Trypanosoma</i> |
|-----------|-------|-----|-------------|--------------------|--------|----------------------|
| <b>AR</b> | N     | ♀   | 7           | 28.6               | 28.6   | 14.3                 |
|           | N     | ♂   | 3           | 0                  | 0      | 0                    |
|           | Total |     | 10          | 20                 | 20     | 10                   |
| <b>BK</b> | N     | ♀   | 38          | 50                 | 7.9    | 7.9                  |
|           | N     | ♂   | 31          | 58.1               | 6.5    | 9.7                  |
|           | Total |     | 69          | 53.6               | 7.2    | 8.7                  |
| <b>BN</b> | N     | ♀   | 8           | 12.5               | 25     | 25                   |
|           | N     | ♂   | 2           | 0                  | 50     | 0                    |
|           | S     | ♀   | 2           | 0                  | 0      | 50                   |
|           | S     | ♂   | 3           | 0                  | 0      | 33.3                 |
|           | Total |     | 15          | 6.7                | 20     | 26.7                 |
| <b>DK</b> | N     | ♀   | 14          | 57.1               | 0      | 7.1                  |
|           | N     | ♂   | 14          | 71.4               | 35.7   | 21.4                 |
|           | Total |     | 28          | 64.3               | 17.9   | 14.3                 |
| <b>MY</b> | N     | ♀   | 0           | -                  | -      | -                    |
|           | N     | ♂   | 16          | 31.3               | 25     | 12.5                 |
|           | Total |     | 37          | 51.4               | 10.8   | 5.4                  |
| <b>OS</b> | N     | ♀   | 7           | 14.3               | 14.3   | 57.1                 |
|           | N     | ♂   | 13          | 23.1               | 23.1   | 30.8                 |
|           | Total |     | 20          | 20                 | 20     | 40                   |
| <b>PT</b> | N     | ♀   | 10          | 20                 | 20     | 20                   |
|           | N     | ♂   | 7           | 0                  | 0      | 0                    |
| Total     |       | 17  | 11.8        | 11.8               | 11.8   |                      |

(b) the southern microsatellite group: BU, BV, JN\*, NA, KL and SS

|           | mtDNA | Sex | Sample Size | % <i>Wolbachia</i> | % SGHV | % <i>Trypanosoma</i> |
|-----------|-------|-----|-------------|--------------------|--------|----------------------|
| <b>BU</b> | S     | ♀   | 19          | 31.6               | 0      | 26.3                 |
|           | S     | ♂   | 15          | 26.7               | 0      | 20                   |
|           | Total |     | 34          | 29.4               | 0      | 23.5                 |
| <b>BV</b> | S     | ♀   | 20          | 75                 | 0      | 0                    |
|           | S     | ♂   | 15          | 40                 | 13.3   | 0                    |
|           | Total |     | 35          | 60                 | 5.7    | 0                    |
| <b>JN</b> | N     | ♀   | 19          | 57.9               | 5.3    | 26.3                 |
|           | N     | ♂   | 21          | 71.4               | 23.8   | 42.9                 |
|           | Total |     | 43          | 65.1               | 14     | 34.9                 |
| <b>KL</b> | S     | ♀   | 5           | 100                | 0      | 0                    |
|           | S     | ♂   | 5           | 100                | 0      | 0                    |
|           | Total |     | 10          | 100                | 0      | 0                    |
| <b>NA</b> | S     | ♀   | 19          | 5.3                | 15.8   | 10.5                 |
|           | S     | ♂   | 20          | 10                 | 20     | 25                   |
|           | Total |     | 40          | 7.5                | 17.5   | 17.5                 |
| <b>SS</b> | S     | ♀   | 12          | 83.3               | 0      | 16.7                 |
|           | S     | ♂   | 29          | 89.7               | 13.8   | 44.8                 |
|           | Total |     | 52          | 86.5               | 7.7    | 28.8                 |

\*Both northern (N) and southern (S) mtDNA haplogroups co-occur in JN individuals

(J. S. Beadell et al., PLoS Negl. Trop. Dis. 4:e636, 2010), but the individuals we have infection data for are all assigned to the northern haplogroup.

(c) the western microsatellite group: KB, KF, KK, KR and MS

|       | mtDNA | Sex | Sample Size | %<br><i>Wolbachia</i> | %<br>SGHV | %<br><i>Trypanosoma</i> |
|-------|-------|-----|-------------|-----------------------|-----------|-------------------------|
| KB    | S     | ♀   | 9           | 44.4                  | 0         | 22.2                    |
|       | S     | ♂   | 15          | 53.3                  | 0         | 33.3                    |
|       | Total |     | 24          | 50                    | 0         | 29.2                    |
| KF    | N     | ♀   | 8           | 37.5                  | 62.5      | 12.5                    |
|       | N     | ♂   | 7           | 0                     | 28.6      | 57.1                    |
|       | S     | ♀   | 1           | 0                     | 100       | 0                       |
|       | S     | ♂   | 1           | 0                     | 0         | 0                       |
|       | Total |     | 17          | 17.6                  | 47.1      | 29.4                    |
| KK    | S     | ♀   | 14          | 50                    | 21.4      | 21.4                    |
|       | S     | ♂   | 14          | 21.4                  | 14.3      | 7.1                     |
|       | Total |     | 28          | 35.7                  | 17.9      | 14.3                    |
| KR    | N     | ♀   | 8           | 0                     | 12.5      | 0                       |
|       | N     | ♂   | 4           | 0                     | 25        | 25                      |
|       | S     | ♀   | 0           | -                     | -         | -                       |
|       | S     | ♂   | 3           | 0                     | 33.3      | 0                       |
|       | Total |     | 15          | 0                     | 20        | 6.7                     |
| MS    | N     | ♀   | 4           | 0                     | 0         | 25                      |
|       | N     | ♂   | 5           | 20                    | 0         | 20                      |
|       | S     | ♀   | 5           | 0                     | 0         | 20                      |
|       | S     | ♂   | 2           | 0                     | 0         | 0                       |
| Total |       | 16  | 6.3         | 0                     | 18.8      |                         |

**Table S2. (a) *Wolbachia* (*Wol.*), SGHV and *Trypanosoma* (*Tryp.*) individual infection comparisons. Group means were compared by simple logistic regression contrast. Tsetse flies were assigned to groups based on sampling locality (abbreviations from Table 1), microsatellite data (n=north, s=south, w=west) and mtDNA data (N=north, S=south). We also compared sexes (F=female, M=male) within these groups. The table only contains comparisons with significant p-values ( $\text{Pr}( > |z| )$ ). P-values have also been corrected ( $\text{Adj}(\text{Pr}( > |z| ))$ ) using logically constrained multiplicity adjustment (P. H. Westfall, J. Am. Stat. Assoc. 92:299-306, 1997), except in the case of comparisons involving sampling locality where ‘free combination’ adjustment was used (Westfall and SAS Institute, Cary, NC 1999). Comparisons significant after adjustment are shown in bold type ( $\text{Adj}(\text{Pr}( > |z| )) < 0.05$ ).**

| <b><i>Wolbachia</i></b> |        |          |                    |                         |
|-------------------------|--------|----------|--------------------|-------------------------|
| <b>Comparison</b>       |        | <b>z</b> | <b>Pr(&gt; z )</b> | <b>Adj(Pr(&gt; z ))</b> |
| s                       | n      | 2.49     | 0.013              | <b>0.013</b>            |
| n                       | w      | 2.73     | 0.006              | <b>0.006</b>            |
| s                       | w      | 4.63     | 0.000              | <b>0.000</b>            |
| BV (F)                  | BV (M) | 2.04     | 0.042              | 0.514                   |
| BK                      | BN     | 2.62     | 0.009              | 0.285                   |
| BK                      | BU     | 2.28     | 0.022              | 0.501                   |
| BK                      | KF     | 2.48     | 0.013              | 0.374                   |
| BK                      | MS     | 2.69     | 0.007              | 0.251                   |
| BK                      | NA     | 4.11     | 0.000              | <b>0.003</b>            |
| BK                      | OS     | 2.52     | 0.012              | 0.352                   |
| BK                      | PT     | 2.73     | 0.006              | 0.233                   |
| BU                      | NA     | 2.31     | 0.021              | 0.482                   |

|    |    |      |       |              |
|----|----|------|-------|--------------|
| BV | AR | 2.08 | 0.038 | 0.645        |
| BV | BN | 2.79 | 0.005 | 0.204        |
| BV | BU | 2.51 | 0.012 | 0.355        |
| BV | KF | 2.69 | 0.007 | 0.251        |
| BV | MS | 2.86 | 0.004 | 0.172        |
| BV | NA | 4.21 | 0.000 | <b>0.002</b> |
| BV | OS | 2.73 | 0.006 | 0.233        |
| BV | PT | 2.92 | 0.003 | 0.149        |
| DK | AR | 2.23 | 0.025 | 0.525        |
| DK | BN | 2.91 | 0.004 | 0.152        |
| DK | BU | 2.68 | 0.007 | 0.251        |
| DK | KF | 2.84 | 0.004 | 0.181        |
| DK | KK | 2.11 | 0.035 | 0.624        |
| DK | MS | 2.98 | 0.003 | 0.128        |
| DK | NA | 4.32 | 0.000 | <b>0.001</b> |
| DK | OS | 2.89 | 0.004 | 0.163        |
| DK | PT | 3.06 | 0.002 | 0.103        |
| JN | AR | 2.36 | 0.018 | 0.449        |
| JN | BN | 3.01 | 0.003 | 0.119        |
| JN | BU | 3.04 | 0.002 | 0.111        |
| JN | KF | 3.04 | 0.002 | 0.111        |
| JN | KK | 2.39 | 0.017 | 0.434        |
| JN | MS | 3.08 | 0.002 | 0.100        |
| JN | NA | 4.61 | 0.000 | <b>0.000</b> |
| JN | OS | 3.12 | 0.002 | 0.090        |

|    |    |      |       |              |
|----|----|------|-------|--------------|
| JN | PT | 3.23 | 0.001 | 0.066        |
| KB | BN | 2.37 | 0.018 | 0.439        |
| KB | KF | 2.04 | 0.042 | 0.673        |
| KB | MS | 2.44 | 0.015 | 0.401        |
| KB | NA | 3.46 | 0.001 | <b>0.032</b> |
| KB | OS | 2.00 | 0.045 | 0.698        |
| KB | PT | 2.35 | 0.019 | 0.452        |
| KK | NA | 2.68 | 0.007 | 0.253        |
| SS | AR | 3.65 | 0.000 | <b>0.016</b> |
| SS | BK | 3.63 | 0.000 | <b>0.018</b> |
| SS | BN | 4.05 | 0.000 | <b>0.004</b> |
| SS | BU | 4.94 | 0.000 | <b>0.000</b> |
| SS | BV | 2.73 | 0.006 | 0.233        |
| SS | DK | 2.25 | 0.025 | 0.522        |
| SS | JN | 2.39 | 0.017 | 0.434        |
| SS | KB | 3.23 | 0.001 | 0.066        |
| SS | KF | 4.51 | 0.000 | <b>0.000</b> |
| SS | KK | 4.32 | 0.000 | <b>0.001</b> |
| SS | MS | 4.12 | 0.000 | <b>0.003</b> |
| SS | NA | 6.03 | 0.000 | <b>0.000</b> |
| SS | OS | 4.70 | 0.000 | <b>0.000</b> |
| SS | PT | 4.53 | 0.000 | <b>0.000</b> |

**SGHV**

| Comparison |       | z    | Pr(> z ) | Adj(Pr(> z )) |
|------------|-------|------|----------|---------------|
| s (M)      | s (F) | 2.25 | 0.024    | 0.071         |

|    |    |      |       |              |
|----|----|------|-------|--------------|
| N  | S  | 2.28 | 0.022 | <b>0.022</b> |
| KF | BK | 3.62 | 0.000 | <b>0.019</b> |
| KF | BV | 3.07 | 0.002 | 0.111        |
| KF | DK | 2.03 | 0.042 | 0.756        |
| KF | JN | 2.60 | 0.009 | 0.343        |
| KF | KK | 2.03 | 0.042 | 0.756        |
| KF | NA | 2.24 | 0.025 | 0.608        |
| KF | PT | 2.12 | 0.034 | 0.701        |
| KF | SS | 3.33 | 0.001 | <b>0.051</b> |

***Trypanosoma***

| Comparison |       | z    | Pr(> z ) | Adj(Pr(> z )) |
|------------|-------|------|----------|---------------|
| s (M)      | s (F) | 2.39 | 0.017    | <b>0.050</b>  |
| BU         | BK    | 1.99 | 0.046    | 0.796         |
| JN         | BK    | 3.24 | 0.001    | 0.074         |
| KB         | BK    | 2.36 | 0.018    | 0.527         |
| KF         | BK    | 2.16 | 0.031    | 0.681         |
| OS         | BK    | 3.11 | 0.002    | 0.105         |
| OS         | DK    | 1.96 | 0.050    | 0.813         |
| OS         | KK    | 1.96 | 0.050    | 0.813         |
| OS         | KR    | 1.97 | 0.048    | 0.805         |
| SS         | BK    | 2.76 | 0.006    | 0.255         |

**Table S2. (b) *Wolbachia* (*Wol.*), SGHV and *Trypanosoma* (*Tryp.*) co-infection comparisons.** Group means were compared by multiple logistic regression contrast. For two-infection comparisons, the groups compared were microsatellites, mtDNA and sampling site (only: AR, BK, BN, DK, JN, KF, KK, NA, OS, PT and SS). For three-infection comparisons, the groups compared were microsatellites (n=north, s=south, w=west) and mtDNA (N=north, S=south). In two-infection comparisons, one infection was compared for differences between groups when the other infection was present (+) or absent (-). In three-infection comparisons, one infection was compared for differences between groups when the other two infections were present (+) or absent (-). Only comparisons with significant p-values ( $\text{Pr}( > |z| )$ ) are reported. Multiple comparison correction was done using logically constrained multiplicity adjustment (Westfall & Young 1997), except in the case of comparisons involving sampling site where ‘free combination’ adjustment was used (Westfall & Young 1999). Adjusted p-values ( $\text{Adj}(\text{Pr}( > |z| ))$ ) smaller than 0.05 are shown in bold type.

|                  |                  | <i>Wol-</i> |                      |                                  |
|------------------|------------------|-------------|----------------------|----------------------------------|
| Comparison       |                  | z           | $\text{Pr}( >  z  )$ | $\text{Adj}(\text{Pr}( >  z  ))$ |
| SGHV (N)         | SGHV (S)         | 2.36        | 0.018                | <b>0.037</b>                     |
| SGHV (KF)        | SGHV (BK)        | 2.04        | 0.041                | 0.828                            |
| <i>Tryp</i> (BN) | <i>Tryp</i> (BK) | 2.14        | 0.032                | 0.763                            |
| <i>Tryp</i> (JN) | <i>Tryp</i> (BK) | 2.89        | 0.004                | 0.208                            |
| <i>Tryp</i> (JN) | <i>Tryp</i> (KK) | 2.34        | 0.019                | 0.605                            |
| <i>Tryp</i> (JN) | <i>Tryp</i> (NA) | 1.98        | 0.047                | 0.860                            |
| <i>Tryp</i> (JN) | <i>Tryp</i> (PT) | 2.17        | 0.030                | 0.746                            |
| <i>Tryp</i> (KF) | <i>Tryp</i> (BK) | 2.46        | 0.014                | 0.512                            |



|                  |                  |      |       |       |
|------------------|------------------|------|-------|-------|
| <i>Tryp</i> (KF) | <i>Tryp</i> (KK) | 1.92 | 0.055 | 0.892 |
| <i>Tryp</i> (OS) | <i>Tryp</i> (BK) | 2.56 | 0.010 | 0.423 |
| <i>Tryp</i> (OS) | <i>Tryp</i> (KK) | 2.02 | 0.044 | 0.844 |

| <b>SGHV-</b>      |                 |          |                    |                         |
|-------------------|-----------------|----------|--------------------|-------------------------|
| <b>Comparison</b> |                 | <b>z</b> | <b>Pr(&gt; z )</b> | <b>Adj(Pr(&gt; z ))</b> |
| <i>Wol</i> (s)    | <i>Wol</i> (w)  | 4.2      | 0.000              | <b>0.000</b>            |
| <i>Wol</i> (n)    | <i>Wol</i> (w)  | 2.44     | 0.015              | <b>0.053</b>            |
| <i>Wol</i> (s)    | <i>Wol</i> (n)  | 2.31     | 0.021              | 0.074                   |
| <i>Wol</i> (BK)   | <i>Wol</i> (AR) | 1.94     | 0.052              | 0.837                   |
| <i>Wol</i> (BK)   | <i>Wol</i> (BN) | 2.41     | 0.016              | 0.491                   |
| <i>Wol</i> (BK)   | <i>Wol</i> (NA) | 3.8      | 0.000              | <b>0.010</b>            |
| <i>Wol</i> (BK)   | <i>Wol</i> (OS) | 2.4      | 0.016              | 0.494                   |
| <i>Wol</i> (BK)   | <i>Wol</i> (PT) | 2.57     | 0.010              | 0.366                   |
| <i>Wol</i> (DK)   | <i>Wol</i> (AR) | 2.07     | 0.038              | 0.748                   |
| <i>Wol</i> (DK)   | <i>Wol</i> (BN) | 2.52     | 0.012              | 0.410                   |
| <i>Wol</i> (DK)   | <i>Wol</i> (NA) | 3.7      | 0.000              | <b>0.013</b>            |
| <i>Wol</i> (DK)   | <i>Wol</i> (OS) | 2.48     | 0.013              | 0.437                   |
| <i>Wol</i> (DK)   | <i>Wol</i> (PT) | 2.65     | 0.008              | 0.311                   |
| <i>Wol</i> (JN)   | <i>Wol</i> (AR) | 2.28     | 0.023              | 0.599                   |
| <i>Wol</i> (JN)   | <i>Wol</i> (BN) | 2.74     | 0.006              | 0.259                   |
| <i>Wol</i> (JN)   | <i>Wol</i> (NA) | 4.19     | 0.000              | <b>0.002</b>            |
| <i>Wol</i> (JN)   | <i>Wol</i> (OS) | 2.86     | 0.004              | 0.192                   |
| <i>Wol</i> (JN)   | <i>Wol</i> (PT) | 2.98     | 0.003              | 0.144                   |
| <i>Wol</i> (KK)   | <i>Wol</i> (NA) | 2.77     | 0.006              | 0.243                   |
| <i>Wol</i> (SS)   | <i>Wol</i> (AR) | 3.24     | 0.001              | 0.066                   |

|                  |                  |      |       |              |
|------------------|------------------|------|-------|--------------|
| <i>Wol</i> (SS)  | <i>Wol</i> (BK)  | 3.29 | 0.001 | 0.056        |
| <i>Wol</i> (SS)  | <i>Wol</i> (BN)  | 3.71 | 0.000 | <b>0.013</b> |
| <i>Wol</i> (SS)  | <i>Wol</i> (DK)  | 2.24 | 0.025 | 0.623        |
| <i>Wol</i> (SS)  | <i>Wol</i> (JN)  | 2.16 | 0.031 | 0.689        |
| <i>Wol</i> (SS)  | <i>Wol</i> (KK)  | 3.46 | 0.001 | <b>0.033</b> |
| <i>Wol</i> (SS)  | <i>Wol</i> (NA)  | 5.57 | 0.000 | <b>0.000</b> |
| <i>Wol</i> (SS)  | <i>Wol</i> (OS)  | 4.26 | 0.000 | <b>0.002</b> |
| <i>Wol</i> (SS)  | <i>Wol</i> (PT)  | 4.22 | 0.000 | <b>0.002</b> |
| <i>Tryp</i> (BN) | <i>Tryp</i> (BK) | 2.11 | 0.035 | 0.790        |
| <i>Tryp</i> (JN) | <i>Tryp</i> (BK) | 2.77 | 0.006 | 0.285        |
| <i>Tryp</i> (JN) | <i>Tryp</i> (NA) | 1.95 | 0.051 | 0.879        |
| <i>Tryp</i> (OS) | <i>Tryp</i> (BK) | 2.62 | 0.009 | 0.389        |
| <i>Tryp</i> (OS) | <i>Tryp</i> (NA) | 1.98 | 0.048 | 0.866        |
| <i>Tryp</i> (SS) | <i>Tryp</i> (BK) | 2.38 | 0.018 | 0.581        |

### SGHV+

| Comparison      |                 | z    | Pr(> z ) | Adj(Pr(> z )) |
|-----------------|-----------------|------|----------|---------------|
| <i>Tryp</i> (s) | <i>Tryp</i> (n) | 2.17 | 0.030    | 0.146         |

### *Tryp*-

| Comparison      |                 | z    | Pr(> z ) | Adj(Pr(> z )) |
|-----------------|-----------------|------|----------|---------------|
| <i>Wol</i> (s)  | <i>Wol</i> (w)  | 4.24 | 0.000    | <b>0.000</b>  |
| <i>Wol</i> (n)  | <i>Wol</i> (w)  | 2.57 | 0.010    | <b>0.036</b>  |
| <i>Wol</i> (s)  | <i>Wol</i> (n)  | 2.28 | 0.023    | 0.079         |
| <i>Wol</i> (BK) | <i>Wol</i> (BN) | 2.16 | 0.031    | 0.713         |
| <i>Wol</i> (BK) | <i>Wol</i> (NA) | 3.56 | 0.000    | <b>0.026</b>  |
| <i>Wol</i> (BK) | <i>Wol</i> (OS) | 2.01 | 0.044    | 0.815         |

|                 |                 |      |       |              |
|-----------------|-----------------|------|-------|--------------|
| <i>Wol</i> (BK) | <i>Wol</i> (PT) | 2.51 | 0.012 | 0.436        |
| <i>Wol</i> (DK) | <i>Wol</i> (AR) | 1.95 | 0.052 | 0.852        |
| <i>Wol</i> (DK) | <i>Wol</i> (BN) | 2.49 | 0.013 | 0.448        |
| <i>Wol</i> (DK) | <i>Wol</i> (KF) | 2.04 | 0.041 | 0.800        |
| <i>Wol</i> (DK) | <i>Wol</i> (KK) | 2.27 | 0.023 | 0.629        |
| <i>Wol</i> (DK) | <i>Wol</i> (NA) | 3.81 | 0.000 | <b>0.011</b> |
| <i>Wol</i> (DK) | <i>Wol</i> (OS) | 2.4  | 0.016 | 0.518        |
| <i>Wol</i> (DK) | <i>Wol</i> (PT) | 2.82 | 0.005 | 0.226        |
| <i>Wol</i> (JN) | <i>Wol</i> (AR) | 2.4  | 0.017 | 0.520        |
| <i>Wol</i> (JN) | <i>Wol</i> (BN) | 2.85 | 0.004 | 0.211        |
| <i>Wol</i> (JN) | <i>Wol</i> (KF) | 2.56 | 0.011 | 0.395        |
| <i>Wol</i> (JN) | <i>Wol</i> (KK) | 2.94 | 0.003 | 0.172        |
| <i>Wol</i> (JN) | <i>Wol</i> (NA) | 4.37 | 0.000 | <b>0.001</b> |
| <i>Wol</i> (JN) | <i>Wol</i> (OS) | 2.87 | 0.004 | 0.201        |
| <i>Wol</i> (JN) | <i>Wol</i> (PT) | 3.18 | 0.001 | 0.086        |
| <i>Wol</i> (SS) | <i>Wol</i> (AR) | 3.16 | 0.002 | 0.095        |
| <i>Wol</i> (SS) | <i>Wol</i> (BK) | 3.14 | 0.002 | 0.098        |
| <i>Wol</i> (SS) | <i>Wol</i> (BN) | 3.46 | 0.001 | <b>0.036</b> |
| <i>Wol</i> (SS) | <i>Wol</i> (KF) | 3.42 | 0.001 | <b>0.041</b> |
| <i>Wol</i> (SS) | <i>Wol</i> (KK) | 4    | 0.000 | <b>0.005</b> |
| <i>Wol</i> (SS) | <i>Wol</i> (NA) | 5.25 | 0.000 | <b>0.000</b> |
| <i>Wol</i> (SS) | <i>Wol</i> (OS) | 3.64 | 0.000 | <b>0.020</b> |
| <i>Wol</i> (SS) | <i>Wol</i> (PT) | 3.8  | 0.000 | <b>0.011</b> |
| SGHV (w)        | SGHV (s)        | 2.1  | 0.035 | 0.168        |
| SGHV (n)        | SGHV (s)        | 1.98 | 0.048 | 0.168        |

|           |           |      |       |       |
|-----------|-----------|------|-------|-------|
| SGHV (KF) | SGHV (BK) | 2.83 | 0.005 | 0.255 |
| SGHV (KF) | SGHV (JN) | 2.11 | 0.035 | 0.801 |
| SGHV (KF) | SGHV (NA) | 2.08 | 0.038 | 0.820 |
| SGHV (KF) | SGHV (SS) | 2.71 | 0.007 | 0.331 |

### *Tryp+*

| Comparison      |                 | z    | Pr(> z ) | Adj(Pr(> z )) |
|-----------------|-----------------|------|----------|---------------|
| <i>Wol</i> (BK) | <i>Wol</i> (OS) | 1.98 | 0.048    | 0.834         |
| <i>Wol</i> (SS) | <i>Wol</i> (JN) | 2.17 | 0.030    | 0.713         |
| <i>Wol</i> (SS) | <i>Wol</i> (OS) | 2.84 | 0.005    | 0.220         |
| SGHV (KF)       | SGHV (SS)       | 1.92 | 0.055    | 0.904         |

### *SGHV- & Tryp.-*

| Comparison      |                 | z    | Pr(> z ) | Adj(Pr(> z )) |
|-----------------|-----------------|------|----------|---------------|
| <i>Wol.</i> (s) | <i>Wol.</i> (w) | 4.04 | 0.000    | <b>0.000</b>  |
| <i>Wol.</i> (n) | <i>Wol.</i> (w) | 2.57 | 0.010    | 0.081         |
| <i>Wol.</i> (s) | <i>Wol.</i> (n) | 2.01 | 0.045    | 0.309         |

### *Wol.+ & Tryp.-*

| Comparison |          | z    | Pr(> z ) | Adj(Pr(> z )) |
|------------|----------|------|----------|---------------|
| SGHV (N)   | SGHV (S) | 2.16 | 0.031    | 0.117         |

**Table S3.** Simple and multiple logistic regression models. Multiple models include two-pathogen (one pathogen as an independent variable and another as a dependent variable) and three-pathogen regression (two pathogens as independent variables and the third as a dependent variable).

| Logistic Regression Models |                   |                        | Dependent Variables   |                       |                  |
|----------------------------|-------------------|------------------------|-----------------------|-----------------------|------------------|
|                            |                   |                        | <i>Wol.</i>           | <i>SGHV</i>           | <i>Tryp.</i>     |
| Regression                 | Simple            | Host Groups            | <i>Pop</i>            | <i>Pop</i>            | <i>Pop</i>       |
|                            |                   |                        | <i>msat</i>           | <i>msat</i>           | <i>msat</i>      |
|                            |                   |                        | <i>mtDNA</i>          | <i>mtDNA</i>          | <i>mtDNA</i>     |
|                            |                   |                        | <i>Sex</i>            | <i>Sex</i>            | <i>Sex</i>       |
|                            |                   | Host Groups            | <i>Sex*Pop</i>        | <i>Sex*Pop</i>        | <i>Sex*Pop</i>   |
|                            |                   |                        | <i>Sex*msat</i>       | <i>Sex*msat</i>       | <i>Sex*msat</i>  |
|                            |                   |                        | <i>Sex*mtDNA</i>      | <i>Sex*mtDNA</i>      | <i>Sex*mtDNA</i> |
|                            |                   |                        | Two Pathogens         | <i>SGHV*Pop</i>       | <i>Wol*Pop</i>   |
|                            | <i>Tryp*Pop</i>   | <i>Tryp*Pop</i>        |                       | <i>Wol*Pop</i>        |                  |
|                            | <i>SGHV*msat</i>  | <i>Wol*msat</i>        |                       | <i>SGHV*msat</i>      |                  |
|                            | <i>Tryp*msat</i>  | <i>Tryp*msat</i>       |                       | <i>Wol*msat</i>       |                  |
|                            | <i>SGHV*mtDNA</i> | <i>Wol*mtDNA</i>       |                       | <i>SGHV*mtDNA</i>     |                  |
|                            | <i>Tryp*mtDNA</i> | <i>Tryp*mtDNA</i>      |                       | <i>Wol*mtDNA</i>      |                  |
|                            | Three Pathogens   | <i>SGHV*Tryp*msat</i>  | <i>Wol*Tryp*msat</i>  | <i>SGHV*Wol*msat</i>  |                  |
|                            |                   | <i>SGHV*Tryp*mtDNA</i> | <i>Wol*Tryp*mtDNA</i> | <i>SGHV*Wol*mtDNA</i> |                  |

**Figure S1.** Trypanosome infection detection in challenged flies

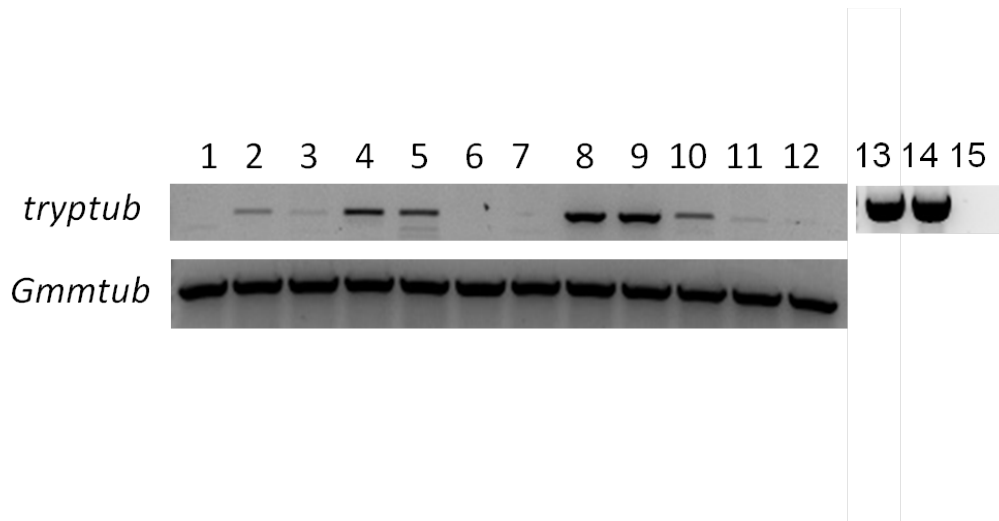

In order to confirm that the parasites detected in field flies represent true infections, we performed a laboratory experiment where 12 newly eclosed *Gmm* males were given an infectious bloodmeal containing  $10^5$  parasites/ml. Subsequently DNA was prepared from whole flies 48h post challenge. PCR amplification was performed on fly DNA using trypanosome *tubulin* primer set (Lanes 1-12). Trypanosome DNA (Lane 13) and midgut DNA from a fly, which was confirmed to be trypanosome infected by dissection and microscopy two weeks after exposure (Lane 14) were used as positive controls. No DNA control is shown in Lane 15 and served as the negative control. Tsetse  $\beta$ -*tubulin* (*Gmmtub*) was used as an internal control. All PCR conditions were the same as those performed with the *Gff* field samples (40 cycles of 94°C for 1 min., 55°C for 30 sec. and 72°C for 30 sec., with a final 72°C). The PCR experiment was independently repeated twice.
